# Supplementary material
Source: bioRxiv or medRxiv preprint supplement (https://www.biorxiv.org/highwire/filestream/24588/field_highwire_adjunct_files/0/087924-1.pdf)
Supplement: Supplementary file [file 087924-1.pdf]

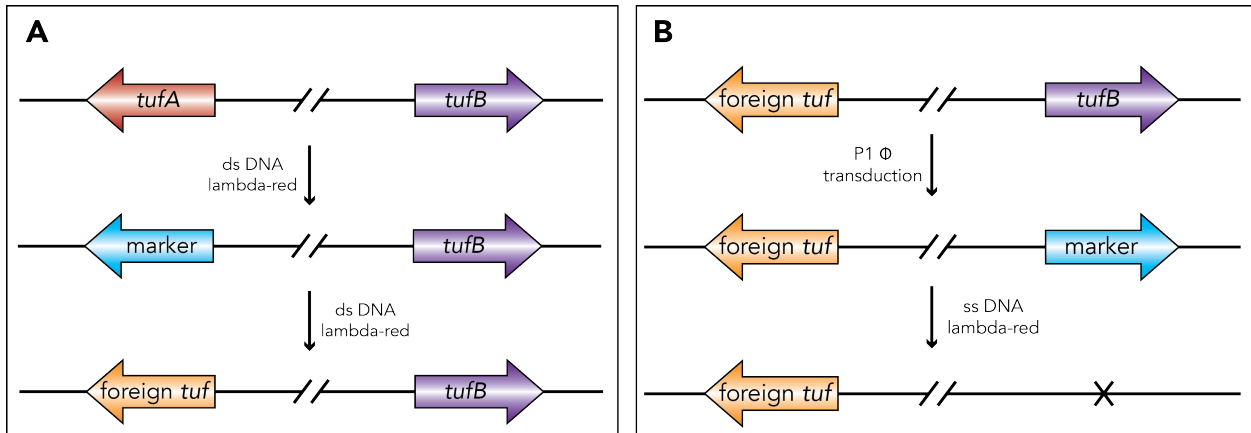

**Supplementary Figure 1:** Foreign *tuf* genes were integrated into the bacterial genome in a stepwise fashion as shown. A. Each of the foreign *tuf* genes was integrated into the *E. coli* chromosome (replacing *tufA*). B. In each strain carrying a foreign *tuf* gene at the *tufA* locus an attempt was made to remove the native *E. coli tufB* gene.

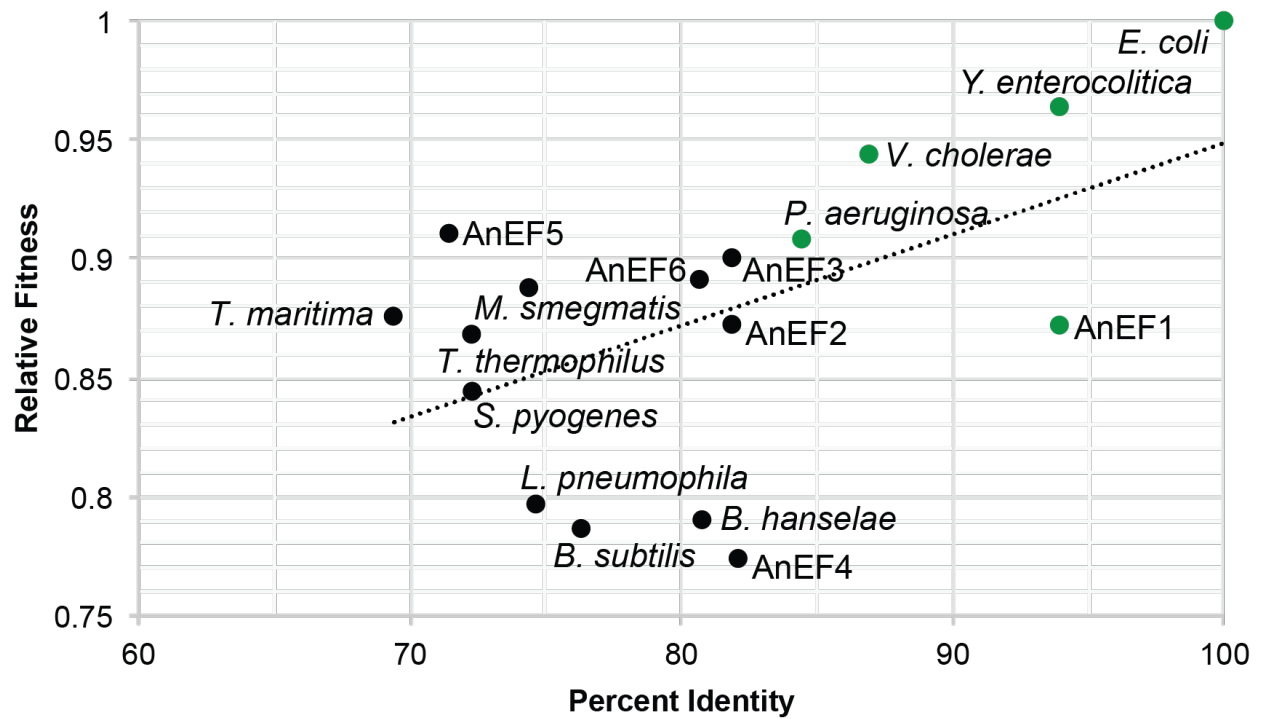

**Supplementary Figure 2.** Relative fitness of strains carrying two *tuf* genes (*tufA*-foreign and *tufB* *E. coli*) as a function of identity to *E. coli* EF-Tu (indicated as 100%). Strains shown in green carry a foreign *tuf* gene that can support viability when *E. coli* *tufB* gene has been deleted.

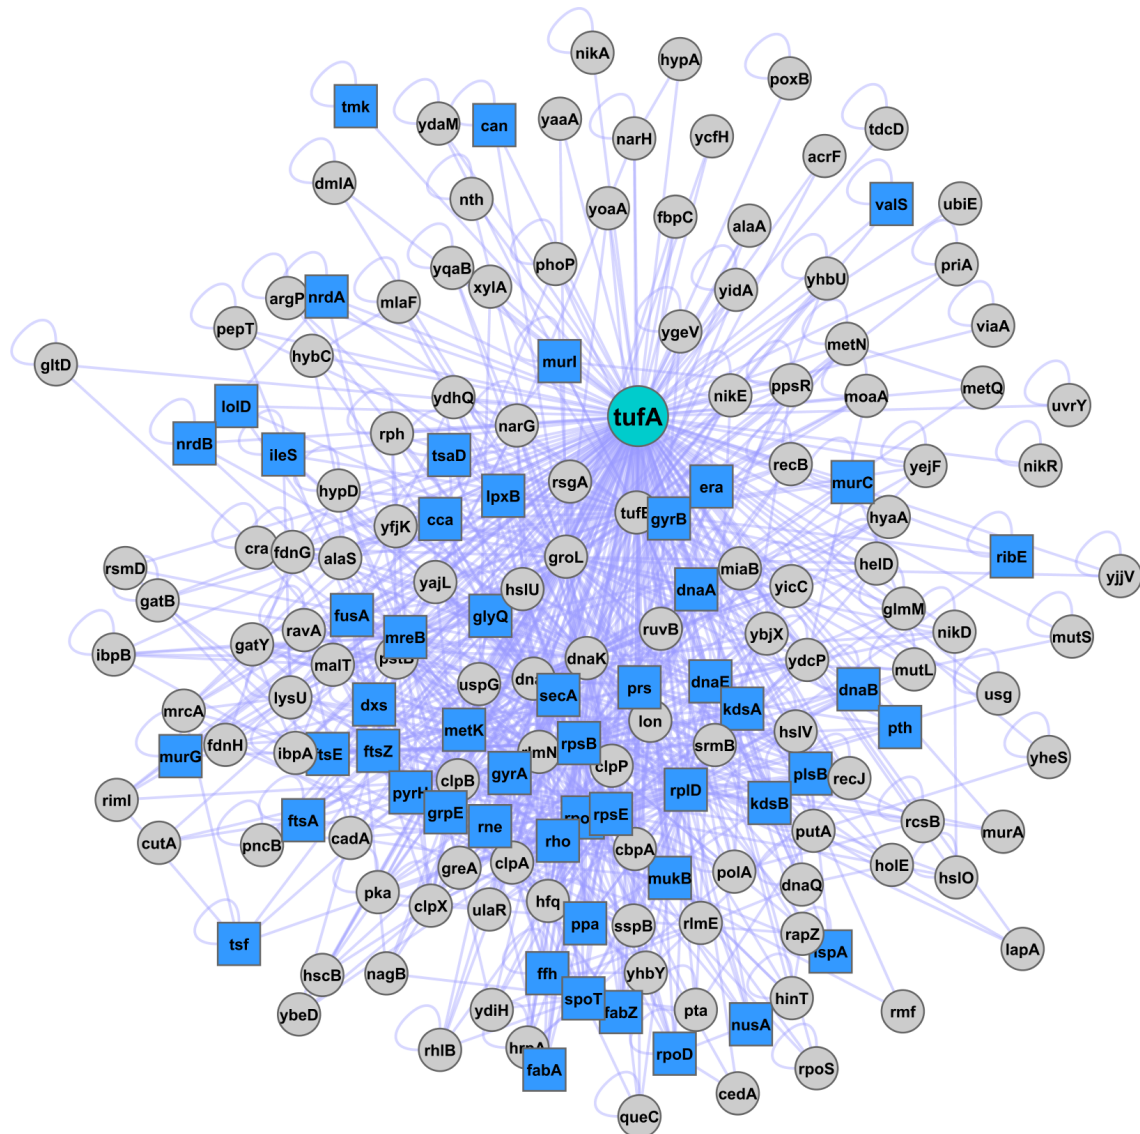

**Supplementary Figure 3:** The interaction partners of EF-Tu and all interactions among these first neighbors of EF-Tu. Nodes represent proteins (indicated by the relevant gene names) and each purple line represents an interaction. To easily distinguish *tufA* in the network, it has been colored cyan. Essential proteins are shaped rectangular and colored blue in this sub-network. Protein-protein interactions of *E. coli* were retrieved from the HitPredict database (Patil, et al. 2011) and the Cytoscape visualization tool was used to draw the network (Demchak, et al. 2014).

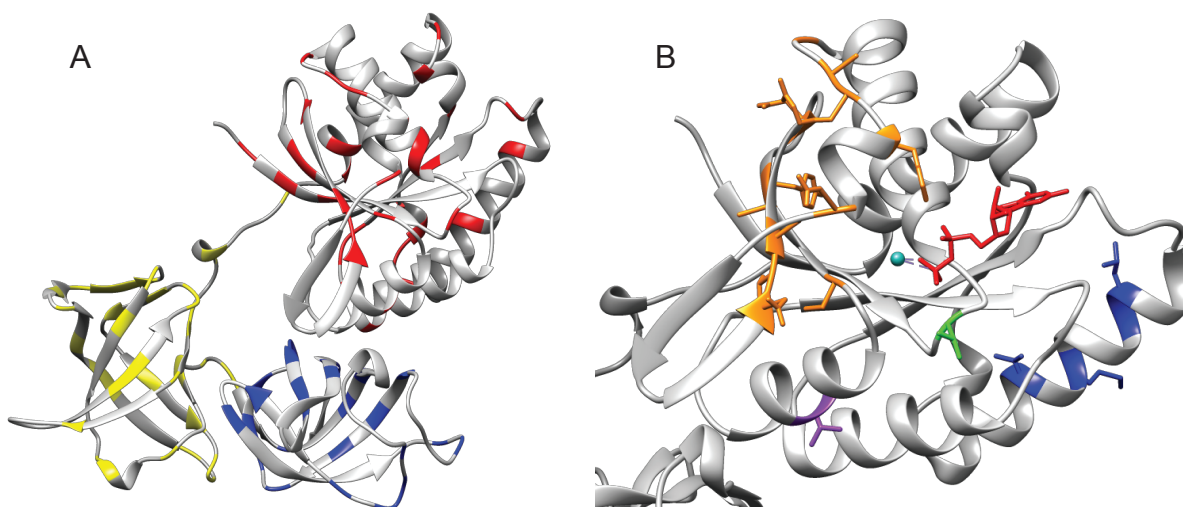

**Supplementary Figure 4: Structural representation EF-Tu-GDP.** EF-Tu is colored gray and residues that are conserved in all viable homologs but changed in at least one of the non-viable homologs are colored. A) Changes within the G-domain are colored in red, domain II in yellow and domain III in blue. B) A close-up view of the G-domain where the change in P-loop is shown in green, changes in the Effector region/Switch I are shown in orange, the change in Switch II in purple and changes in the D-helix in blue. GDP is shown in red and the Mg ion as a cyan sphere. Graphics were performed with the UCSF Chimera package (Pettersen, et al. 2004) using the PDB-ID: 1EFC (Song, et al. 1999).

**Supplementary Table 1.** List of organisms and plasmids serving as EF-Tu sources. \*Synthetic gene sequences are the courtesy of EA Gaucher (Gaucher, et al. 2008).

| Organism/node                  | Strain          | Accession number | Annotation of gene |
|--------------------------------|-----------------|------------------|--------------------|
| <i>Vibrio cholerae</i>         | N16961 El Tor   | NC_016445        | <i>tufB</i>        |
| <i>Mycobacterium smegmatis</i> | MC2 155         | NC_018289        | <i>tuf</i>         |
| <i>Bacillus subtilis</i>       | 186             | NC_000964        | <i>tuf</i>         |
| <i>Thermus thermophilus</i>    | HB8             | ATCC 27634       | <i>tuf</i>         |
| <i>Thermotoga maritima</i>     | DSM3109 [MSB8]  | ATCC 43589       | <i>tuf</i>         |
| <i>Streptococcus pyogenes</i>  | MGAS5005        | NC_007297        | <i>tuf</i>         |
| <i>Legionella pneumophila</i>  | Philadelphia 1  | AE017354         | <i>tufB</i>        |
| <i>Bartonella hansenellae</i>  | Houston 1       | BX897699         | <i>tuf2</i>        |
| <i>Yersinia enterocolitica</i> | 8081            | NC_008800        | <i>tufA</i>        |
| <i>Pseudomonas aeruginosa</i>  | PAO1            | NC_002516        | <i>tufA</i>        |
| Node 317 (700mya)              | Synthetic gene* | N/A              | AnEF1              |
| Node 253 (~1.2bya)             |                 |                  | AnEF2              |
| Node (~1.8bya)                 |                 |                  | AnEF3              |
| Node 168 (~2.5bya)             |                 |                  | AnEF4              |
| Node 184 (~3.5bya)             |                 |                  | AnEF5              |
| Node 262 (~2.5bya)             |                 |                  | AnEF6              |

**Supplementary Table 2:** The elongation factor EF-Tu is among the top ten most connected proteins in the overall *E. coli* interactome. The proteins listed below are ranked according to their connectivity using the Uniprot database. The mean average degree of interaction in the whole interactome is 12.

| Rank | Uniprot Code | Gene Name   | Product Description                              | Degree of Connectivity |
|------|--------------|-------------|--------------------------------------------------|------------------------|
| 1    | P0A6F5       | <i>groL</i> | GroEL, chaperone Hsp60, peptide-dependent ATPase | 702                    |
| 2    | P18843       | <i>nadE</i> | NH(3)-dependent NAD(+) synthetase                | 483                    |
| 3    | P60422       | <i>rplB</i> | 50S ribosomal protein L2                         | 386                    |
| 4    | P0A6Y8       | <i>dnaK</i> | Chaperone protein DnaK                           | 363                    |
| 5    | P60723       | <i>rplD</i> | 50S ribosomal protein L4                         | 244                    |
| 6    | P0A7V8       | <i>rpsD</i> | 30S ribosomal protein S4                         | 242                    |
| 7    | P0A7V3       | <i>rpsC</i> | 30S ribosomal protein S3                         | 225                    |
| 8    | P0A7V0       | <i>rpsB</i> | 30S ribosomal protein S2                         | 206                    |
| 9    | P0A7W1       | <i>rpsE</i> | 30S ribosomal protein S5                         | 192                    |
| 10   | P0CE47       | <i>tufA</i> | Elongation factor TuA                            | 172                    |

|

**Supplementary Table 3:** Strains and genetic markers used in this work and their origin.

| Strain | Species, Genotype or Characteristics                                                      |
|--------|-------------------------------------------------------------------------------------------|
| CH1464 | <i>Escherichia coli</i> K12 MG1655                                                        |
| CH3139 | <i>Pseudomonas aeruginosa</i> PAO1                                                        |
| CH3998 | MG1655 <i>yfaH</i> ::[TP22-amilCP_opt-kan-sacB-T0]                                        |
| CH1940 | MG1655 / pSIM5-tet                                                                        |
| CH4765 | MG1655 <i>tufA</i> ::[TP22-amilCP_opt-kan-sacB-T0]                                        |
| CH4766 | MG1655 <i>tufB</i> ::[TP22-amilCP_opt-kan-sacB-T0]                                        |
| CH4849 | MG1655 <i>tufA</i> ::[TP22-amilCP_opt-kan-sacB-T0] / pSIM5-tet                            |
| CH4931 | MG1655 <i>tufA</i> :: <i>tufA</i> from <i>Salmonella enterica</i> serovar Typhimurium LT2 |
| CH4932 | <i>Bacillus subtilis</i>                                                                  |
| CH4935 | <i>Streptococcus pyogenes</i>                                                             |
| CH4961 | MG1655 <i>tufA</i> :: <i>tuf</i> from <i>Mycobacterium smegmatis</i>                      |
| CH4962 | MG1655 <i>tufA</i> :: <i>tuf</i> from <i>Streptococcus pyogenes</i>                       |
| CH4963 | MG1655 <i>tufA</i> :: <i>tuf</i> from <i>Thermus thermophilus</i>                         |
| CH4964 | MG1655 <i>tufA</i> :: <i>tufB</i> from <i>Vibrio cholerae</i>                             |
| CH4965 | MG1655 <i>tufA</i> :: <i>tuf</i> from <i>Bacillus subtilis</i>                            |
| CH4966 | MG1655 <i>tufA</i> :: <i>tuf</i> from <i>Thermotoga maritima</i>                          |
| CH4967 | MG1655 <i>tufA</i> ::AnEF4                                                                |
| CH4968 | MG1655 <i>tufA</i> ::AnEF5                                                                |

**CH4969** MG1655 *tufA*::AnEF6

**CH4970** MG1655 *tufA*::AnEF1

**CH4971** MG1655 *tufA*::AnEF2

**CH4972** MG1655 *tufA*::AnEF3

**CH5016** MG1655 *tufB*::[TP22-amilCP\_opt-kan-sacB-T0], *tufA*::*tufA* from *Salmonella enterica* serovar Typhimurium LT2

**CH5018** MG1655 *tufB*::[TP22-amilCP\_opt-kan-sacB-T0], *tufA*::*tuf* from *Mycobacterium smegmatis*

**CH5019** MG1655 *tufB*::[TP22-amilCP\_opt-kan-sacB-T0], *tufA*::*tuf* from *Streptococcus pyogenes*

**CH5020** MG1655 *tufB*::[TP22-amilCP\_opt-kan-sacB-T0], *tufA*::*tuf* from *Thermus thermophilus*

**CH5021** MG1655 *tufB*::[TP22-amilCP\_opt-kan-sacB-T0], *tufA*::*tufB* from *Vibrio cholerae*

**CH5022** MG1655 *tufB*::[TP22-amilCP\_opt-kan-sacB-T0], *tufA*::*tuf* from *Bacillus subtilis*

**CH5023** MG1655 *tufB*::[TP22-amilCP\_opt-kan-sacB-T0], *tufA*::*tuf* from *Termotoga maritima*

**CH5024** MG1655 *tufB*::[TP22-amilCP\_opt-kan-sacB-T0], *tufA*::AnEF4

**CH5025** MG1655 *tufB*::[TP22-amilCP\_opt-kan-sacB-T0], *tufA*::AnEF5

**CH5026** MG1655 *tufB*::[TP22-amilCP\_opt-kan-sacB-T0], *tufA*::AnEF6

**CH5027** MG1655 *tufB*::[TP22-amilCP\_opt-kan-sacB-T0], *tufA*::AnEF1

**CH5028** MG1655 *tufB*::[TP22-amilCP\_opt-kan-sacB-T0], *tufA*::AnEF2

**CH5029** MG1655 *tufB*::[TP22-amilCP\_opt-kan-sacB-T0], *tufA*::AnEF3

**CH5088** MG1655 *tufB*::[TP22-amilCP\_opt-kan-sacB-T0], *tufA*::*tufA* from *Salmonella enterica* serovar Typhimurium / pSIM5-tet



**CH5089** MG1655 *tufB*::[TP22-amiCP\_opt-kan-sacB-T0], *tufA*::*tufA* from *Vibrio cholerae* / pSIM5-tet

**CH5091** MG1655  $\Delta$ *tufA*

**CH5130** MG1655 *tufB*::[TP22-amiCP\_opt-kan-sacB-T0], *tufA*::AnEF1 / pSIM5-tet

**CH5132** MG1655  $\Delta$ *tufB*, *tufA*::*tufA* from *Salmonella enterica* serovar Typhimurium LT2

**CH5133** MG1655  $\Delta$ *tufB*, *tufA*::*tufA* from *Vibrio cholerae*

**CH5226** MG1655 *tufB*::[TP22-amiCP\_opt-kan-sacB-T0] / pSIM5-tet

**CH5227** MG1655 *tufA*::*tufB* from *Legionella pneumophila* Philadelphia 1

**CH5228** MG1655 *tufA*::*tuf2* from *Bartonella henselae* Houston 1

**CH5229** MG1655 *tufB*::*tuf* from *Bacillus subtilis*

**CH5234** MG1655  $\Delta$ *tufB*

**CH5235** MG1655  $\Delta$ *tufB*, *tufA*::AnEF1

**CH5239** *Yersinia enterocolitica*

**CH5240** MG1655 *tufB*::[TP22-amiCP\_opt-kan-sacB-T0], *tufA*::*tufB* from *Legionella pneumophila* Philadelphia 1

**CH5241** MG1655 *tufB*::[TP22-amiCP\_opt-kan-sacB-T0], *tufA*::*tuf2* from *Bartonella henselae* Houston 1

**CH5244** MG1655 *tufA*::*tufA* from *Yersinia enterocolitica*

**CH5249** MG1655 *tufA*::*tufA* from *Pseudomonas aeruginosa*

**CH5256** MG1655 *tufB*::[TP22-amiCP\_opt-kan-sacB-T0], *tufA*::*tufA* from *Yersinia enterocolitica*

**CH5258** MG1655 *tufB*::[TP22-amiCP\_opt-kan-sacB-T0], *tufA*::*tufA* from *Pseudomonas*

---

*aeruginosa*

**CH5269** MG1655 *tufB*::[TP22-amiI<sub>CP</sub>\_opt-kan-sacB-T0], *tufA*::*tufA* from *Yersinia enterocolitica* / pSIM5-tet

**CH5271** MG1655 *tufB*::[TP22-amiI<sub>CP</sub>\_opt-kan-sacB-T0], *tufA*::*tufA* from *Pseudomonas aeruginosa* / pSIM5-tet

**CH5277** MG1655  $\Delta$ *tufB*, *tufA*::*tufA* from *Yersinia enterocolitica*

**CH5279** MG1655  $\Delta$ *tufB*, *tufA*::*tufA* from *Pseudomonas aeruginosa*

---

**Supplementary Table 4. Sequences for ancestral *tuf* genes**

| Ancestral gene | Sequence                                                                                                                                                                                                                                                                                                                                                                                                                                                                                                                                                                                                                                                                                                                                                                                                                                                                                                                                                                                                                                                                                                                                                                                                                                                                                                                                                                                               |
|----------------|--------------------------------------------------------------------------------------------------------------------------------------------------------------------------------------------------------------------------------------------------------------------------------------------------------------------------------------------------------------------------------------------------------------------------------------------------------------------------------------------------------------------------------------------------------------------------------------------------------------------------------------------------------------------------------------------------------------------------------------------------------------------------------------------------------------------------------------------------------------------------------------------------------------------------------------------------------------------------------------------------------------------------------------------------------------------------------------------------------------------------------------------------------------------------------------------------------------------------------------------------------------------------------------------------------------------------------------------------------------------------------------------------------|
| AnEF1          | <p>gtgTCCAAAGAGAAATTTGAACGCACGAAACCACATGTAAACGTAGGTA<br/> CCATTGGCCACGTTGATCATGGCAAACCTACCCTGACTGCGGCAATTA<br/> CCACGGTACTGGCGAAAACCTTACGGCGGTGCAGCTCGTGCTTTTCGACC<br/> AGATCGATAACGCTCCGGAGGAGAAAGCTCGTGGCATCACCATCAATA<br/> CGTCCCACGTTGAATACGATACGCCTACCCGTCATTACGCTCATGTAGA<br/> TTGTCCGGGCCACGCGGACTATGTTAAGAACATGATCACGGGCGCAGC<br/> TCAGATGGACGGTGCAATCCTGGTTGTGGCTGCTACCGATGGCCCGAT<br/> GCCGCAGACGCGTGAACACATTCTGCTGGGCCGTCAGGTTGGCGTACC<br/> GTACATTATCGTGTCTTCTGAACAAATGCGACATGGTCGACGATGAAGA<br/> ACTGCTGGAGCTGGTCGAAATGGAGGTGCGCGAACTGCTGTCCAGTA<br/> CGACTTCCCGGGCGATGATACCCCGATCATCCGTGGTTCTGCTCTGAAG<br/> GCTCTGGAAGGCGAAGCAGAATGGGAGGCGAAAATTATCGAGCTGGC<br/> CGAAGCGCTGGACAGCTACATCCAGAACCGGAACGTGCAATCGATC<br/> AGCCGTTTCTGCTGCCGATTGAAGATGTTTTTCAGCATCTCCGGTCGTGG<br/> TACGGTAGTTACCGGCCGTGTGGAACGTGGCATCGTAAAAGTTGGTGA<br/> AGAAGTCGAAATTGTTGGTATCAAAGATACTACCAAACCTACCTGCAC<br/> CGGCGTGAAATGTTCCGCAAACCTGCTGGACGAAGGCCGTGCGGGCG<br/> AAAACGTAGGTGTCTGCTGCGCGGCACCAAACGCGACGAAATCGAG<br/> CGTGGTCAGGTTCTGGCGAAACCGGGCTCCATCACCCCTCACACGACT<br/> TTTGAATCCGAGGTGTACGTGCTGTCTAAAGACGAAGGTGGCCGTAC<br/> ACTCCATTCTTCAAGGGCTATCGTCCGCAGTTCTACTTTTCGCACCACGG<br/> ACGTGACCGGTACCATTTGAACTGCCTGAAGGTGTTGAGATGGTTATGC<br/> CGGGCGACAACATTAATAATGACCGTGACTCTGATCCACCCTATTGCGA<br/> TGGACGAAGGTCTGCGTTTTGCCATCCGTGAAGGTGGTCGTACCGTTG<br/> GCGCCGGTGTGGTTGCGAAAATCATCGCT<sub>taa</sub></p> |
| AnEF2          | <p>gtgGCCAAAGAGAAATTTGAACGCACGAAACCACATGTAAACATCGGTA<br/> CCATTGGCCACGTTGATCATGGCAAACCTACCCTGACTGCGGCAATTA<br/> CCAAGGTAAGGCTCCGGAGGAGAAAGGCAAGCTGAATTTAAGGCTTACGACC<br/> AGATCGATAAAGGCTCCGGAGGAGAAAGAACGTGGCATCACCATCAGC<br/> ACGGCCCACGTTGAATACGAGACTGAAAACCGTCATTACGCTCATGTA<br/> GATTGTCCGGGCCACGCGGACTATGTTAAGAACATGATCACGGGCGCA<br/> GCTCAGATGGACGGTGCAATCCTGGTTGTGTCTGCTGCCGATGGCCCG<br/> ATGCCGCAGACGCGTGAACACATTCTGCTGGCCCGTCAGGTTGGCGTA<br/> CCGTACATTGTCTGTTTCTGAACAAAGTCGACATGGTCGACGATGAA<br/> GAACTGCTGGAGCTGGTCGAAATGGAGGTGCGCGAACTGCTGTCTCTCT<br/> TACGACTTCCCGGGCGATGATATCCCGATCATCAAAGGTTCTGCTCTGA<br/> AGGCTCTGGAAGGCGACGAAGAAGGCGAGGAGGCAATTATGAAGCTG<br/> ATGGACGCGGTGGACAGCTACATCCAGAACCGGAACGTGCAATCGAT<br/> AAGCCGTTTCTGATGCCGATTGAAGATGTTTTTCAGCATCTCCGGTCGTG<br/> GTACGGTAGTTACCGGCCGTGTGGAACGTGGCATCGTAAAAGTTGGTG<br/> AAGAAGTCGAAATTGTTGGTATCCGTGATACTCAGAAAACCTACCTGCA<br/> CCGGCGTGAAATGTTCCGCAAACCTGCTGGACGAAGGCCAAGCGGGC<br/> GACAACGTAGGTGTCTGCTGCGCGGCACGAAACGCGAAGATGTGCA<br/> GCGTGGTCAGGTTCTGGCCAAACCGGGCTCCATCAAACCTCACACGAA<br/> ATTTAAAGCCGAGGTGTACATCCTGACTAAAGAAGAAGGTGGCCGTCA<br/> CACTCCATTCTTCAACGGCTATCGTCCGCAGTTCTACTTTTCGCACCACG</p>                                                                                                                                                                                                                  |

|       |                                                                                                                                                                                                                                                                                                                                                                                                                                                                                                                                                                                                                                                                                                                                                                                                                                                                                                                                                                                                                                                                                                                                                                                                                                                                                                                                    |
|-------|------------------------------------------------------------------------------------------------------------------------------------------------------------------------------------------------------------------------------------------------------------------------------------------------------------------------------------------------------------------------------------------------------------------------------------------------------------------------------------------------------------------------------------------------------------------------------------------------------------------------------------------------------------------------------------------------------------------------------------------------------------------------------------------------------------------------------------------------------------------------------------------------------------------------------------------------------------------------------------------------------------------------------------------------------------------------------------------------------------------------------------------------------------------------------------------------------------------------------------------------------------------------------------------------------------------------------------|
|       | GACGTGACCGGTGTGATTACCCTGCCTGAAGGTGTTGAGATGGTTATG<br>CCGGGCGACAACGTTACTATCACCGTGGAACTGATCGCCCCTATTGCG<br>ATGGAAGAAGGTCTGCGTTTTGCCATTTCGTGAAGGTGGTCGTACCGTT<br>GGCGCCGGTGTGGTTTTCCGAAATCATCGAAtaa                                                                                                                                                                                                                                                                                                                                                                                                                                                                                                                                                                                                                                                                                                                                                                                                                                                                                                                                                                                                                                                                                                                                    |
| AnEF3 | gtgGCCAAAGAGAAATTTGAACGCACGAAACCACATGTAAACATCGGTA<br>CCATTGGCCACGTTGATCATGGCAAACCTACCCTGACTGCGGCAATTA<br>CCAAGTTCTGGCGGAGAAAGGCAAAGCTGAATTTTCGTGCTTACGACC<br>AGATCGATAAGGCTCCGGAGGAGAAAGAGCGTGGCATCACCATCAAC<br>ACGGCCCACGTTGAATACGAGACTGAAAACCGTCATTACGCTCATGTA<br>GATTGTCCGGGCCACGCGGACTATGTTAAGAACATGATCACCGGCGCA<br>GCTCAGATGGACGGTGCAATCCTGGTTGTGTCTGCTGCCGATGGCCCG<br>ATGCCGCAGACGCGTGAACACATTCTGCTGGCCCGTCAGGTTGGCGTA<br>CCGTACATTGTTCGTGTTTCTGAACAAATGCGACATGGTCGACGATGAA<br>GAACTGCTGGAGCTGGTTCGAAATGGAGGTGCGCGAACTGCTGTCCGAG<br>TACGACTTCCCGGGCGATGATATCCCGATCATCCGCGGTTCTGCTCTGA<br>AGGCTCTGGAAGGCGATGAAGAATGGGTGGAAAAGATTATGGAGCTG<br>ATGGACGCGGTGGACAGCTACATCCCAGAACCAGGAACTGACATCGAT<br>AAGCCGTTTCTGATGCCGATTGAAGATGTTTTCAGCATCACCGGTCGTG<br>GTACGGTAGTTACCGGCCGTGTGGAACGTGGCATCGTAAAAGTTGGTG<br>ACGAAGTCGAAATTGTTGGTCTGCGTGATACTCGTAAAACCTGTCGTCA<br>CCGGCGTGGAAATGTTCCGCAAACCTGCTGGACGAAGGCCAGGCGGGC<br>GACAACGTAGGTGTCCTGCTGCGCGGCATCAAACGCGAAGATGTGAG<br>CGTGGTCAGGTTCTGGCCAAACCGGGCTCCATCAAACCTCACACGAAA<br>TTAAAGCCGAGGTGTACGTGCTGACTAAAGAAGAAGGTGGCCGTCAC<br>ACTCCATTCTTCAACGGCTATCGTCCGAGTTCTACTTTCGACCACGG<br>ACGTGACCGGTGTGATTACCCTGCCTGAAGGTGTTGAGATGGTTATGC<br>CGGGCGACAACGTTACTATGACCGTGGAACTGATCCACCCTATTGCGA<br>TGGAAGAAGGTCTGCGTTTTGCCATCCGTGAAGGTGGTCGTACCGTTG<br>GCGCCGGTGTGGTTTTCCGAAATCATCGAAtaa |
| AnEF4 | gtgGCCAAAGAGAAATTTGTACGCACGAAACCACATGTAAACGTCGGTA<br>CCATTGGCCACGTTGATCATGGCAAATCTACCCTGACTGCGGCAATTA<br>CCAAGTATCTGTCTCTGAAAGGCCTGGCTCAATATGTTTCCTTACGACCA<br>GATCGATAAGGCTCCGGAGGAGAAAGCTCGTGGCATCACCATCAACAT<br>TACCCACGTTGAATACGAGACTGAGAAACGTCATTACGCTCATATCGA<br>TTGTCCGGGCCACGCGGACTATATTAAGAACATGATCACCGGCGCAGC<br>TCAGATGGACGGTGCAATCCTGGTTGTGGCTGCTACCGATGGCCCGAT<br>GCCGCAGACGCGTGAACACGTTCTGCTGGCCCGTCAGGTTGGCGTACC<br>GTACATGATCGTGTATCAACAAAACCGACATGGTCGACGATCCAGA<br>ACTGATCGAGCTGGTCGAAATGGAGGTGCGCGATCTGCTGTCCCAGTA<br>CGAATATCCGGGCGATGAAGTCCCGGTCATCAAGGTTCTGCTCTGAA<br>GGCTCTGGAAGCCAACCATGAAGCGTATAAACCAATTCAGGAGCTGCT<br>GGACGCGATGGACAACCTACATCCCAGACCCGCAACGTGACGTCGATA<br>AGCCGTTTCTGATGCCGATTGAAGATGTTTTTCAGCATCACCGGTCGTGG<br>TACGGTAGTTACCGGCCGTATCGAACGTGGCCGCATCCGTCCTGGTGA<br>CGAAGTCGAAATTATTGGTCTGTCTGAGATTCGTAAAACCTGTCGTCACC<br>AGCGTGGAATGTTCCGCAAAGAGCTGGACGAAGGCATTGCGGGCGA<br>CAACGTAGGTTGCCTGCTGCGCGGCATCGACAAAGATGAAGTCGAGCG<br>TGGTCAGGTTCTGGCCGCACCGGGCTCCATCAAACCTCACAAGCGTTTT<br>AAAGCCGAGGTGTACGTGCTGAAGAAAGAAGAAGGTGGCCGTCACAC<br>TCCATTCTTCAAAGGCTATAAACCGCAGTTCTACATTCGACCACGGAC                                                                                                                                                                                                 |

|       |                                                                                                                                                                                                                                                                                                                                                                                                                                                                                                                                                                                                                                                                                                                                                                                                                                                                                                                                                                                                                                                                                                                                                                                                                                                                                                                                      |
|-------|--------------------------------------------------------------------------------------------------------------------------------------------------------------------------------------------------------------------------------------------------------------------------------------------------------------------------------------------------------------------------------------------------------------------------------------------------------------------------------------------------------------------------------------------------------------------------------------------------------------------------------------------------------------------------------------------------------------------------------------------------------------------------------------------------------------------------------------------------------------------------------------------------------------------------------------------------------------------------------------------------------------------------------------------------------------------------------------------------------------------------------------------------------------------------------------------------------------------------------------------------------------------------------------------------------------------------------------|
|       | GTGACCGGTGAGATTGTCCTGCCTGAAGGTGTTGAGATGGTTATGCCG<br>GGCGACCACGTTGAAATGGAAATCGAACTGATCTACCCTGTTGCGATT<br>GAAAAGGGTCAGCGTTTTTGCCATCCGTGAAGGTGGTTCGTACCGTTGGC<br>GCCGGTGTGGTTACCGAAGTCATCGAAtaa                                                                                                                                                                                                                                                                                                                                                                                                                                                                                                                                                                                                                                                                                                                                                                                                                                                                                                                                                                                                                                                                                                                                         |
| AnEF5 | gtgGCCAAAGAGAAATTTGAACGCACGAAACCACATGTAAACATCGGTA<br>CCATTGGCCACGTTGATCATGGCAAACCTACCCTGACTGCGGCAATTA<br>CCAAGACTCTGGCGGCGAAAGGCAAAGCTGAAGCTCGTGCTTACGACC<br>AGATCGATAAGGCTCCGGAGGAGAAAGCTCGTGGCATCACCATCAAC<br>ACGGCCCACGTTGAATACGAGACTGAAAACCGTCATTACGCTCATGTA<br>GATTGTCCGGGCCACGCGGACTATGTTAAGAACATGATCACCGGCGCA<br>GCTCAGATGGACGGTGCAATCCTGGTTGTGTCTGCTGCCGATGGCCCG<br>ATGCCGCAGACGCGTGAACACATTCTGCTGGCCCGTCAGGTTGGCGTA<br>CCGTACATTGTCGTGTTTCTGAACAAATGCGACATGGTCGACGATGAA<br>GAACTGCTGGAGCTGGTTCGAAATGGAGGTGCGCGAACTGCTGTCCGAG<br>TACGAATTTCCGGGCGATGATATCCCGATCATCCGCGGTTCTGCTCTGA<br>AGGCTCTGGAAGGCGAAAATGAATGGGTGGACAAAATTTGGGAGCTG<br>ATGGACGCGGTGGACAGCTACATCCCAACCCCGGAACGTGACGTCGAT<br>AAGCCGTTTCTGATGCCGTTGAAGATGTTTTACCATCACCGGTTCGTG<br>GTACGGTAGCTACCGGCCGTGTGGAACGTGGCACCGTAAAAGTTGGTG<br>ACGAAGTCGAAATTGTTGGTCTGCGTGATACTCGTAAAACCTGTCTGTA<br>CCGGCGTGGAAATGTTCCGCAAACCTGCTGGACGAAGGCATGGCGGGC<br>GACAACGTAGGTGTCCTGCTGCGCGGCATCCAACGCGAAGATGTTCGAG<br>CGTGGTCAGGTTCTGGCCAAACCGGGCTCCATCAAACCTCACACGAAA<br>TTTGAAGCCGAGGTGTACGTGCTGACTAAAGAAGAAGGTGGCCGTCAC<br>ACTCCATTCTCAACGGCTATCGTCCGAGTTCTACTTTCGACCACGG<br>ACGTGACCGGTGTGATTACCCTGCCTGAAGGTGTTGAGATGGTTATGC<br>CGGGCGACAACGTTACTATGACCGTGGAACCTGATCCACCCTATTGCGA<br>TGGAAGAAGGTCTGCGTTTTTGCCATCCGTGAAGGTGGTTCGTACCGTTG<br>GCGCCGGTGTGGTTTCCAAAATCATCGAAtaa |
| AnEF6 | gtgGCCAAAGAGAAATTTGAACGCACGAAACCACATGTAAACATCGGTA<br>CCATTGGCCACGTTGATCATGGCAAACCTACCCTGACTGCGGCAATTA<br>CCAAGACTCTGGCGGCGAAAGGCAAAGCTGAAGCTCGTGCTTACGACC<br>AGATCGATAAGGCTCCGGAGGAGAAAGCTCGTGGCATCACCATCAAC<br>ACGGCCCACGTTGAATACGAGACTGAAAACCGTCATTACGCTCATGTA<br>GATTGTCCGGGCCACGCGGACTATGTTAAGAACATGATCACCGGCGCA<br>GCTCAGATGGACGGTGCAATCCTGGTTGTGTCTGCTGCCGATGGCCCG<br>ATGCCGCAGACGCGTGAACACATTCTGCTGGCCCGTCAGGTTGGCGTA<br>CCGTACATTGTCGTGTTTCTGAACAAATGCGACATGGTCGACGATGAA<br>GAACTGCTGGAGCTGGTTCGAAATGGAGGTGCGCGAACTGCTGTCCGAG<br>TACGAATTTCCGGGCGATGATATCCCGATCATCCGCGGTTCTGCTCTGA<br>AGGCTCTGGAAGGCGAAAATGAATGGGTGGACAAAATTTGGGAGCTG<br>ATGGACGCGGTGGACAGCTACATCCCAACCCCGGAACGTGACGTCGAT<br>AAGCCGTTTCTGATGCCGTTGAAGATGTTTTACCATCACCGGTTCGTG<br>GTACGGTAGCTACCGGCCGTGTGGAACGTGGCACCGTAAAAGTTGGTG<br>ACGAAGTCGAAATTGTTGGTCTGCGTGATACTCGTAAAACCTGTCTGTA<br>CCGGCGTGGAAATGTTCCGCAAACCTGCTGGACGAAGGCATGGCGGGC<br>GACAACGTAGGTGTCCTGCTGCGCGGCATCCAACGCGAAGATGTTCGAG<br>CGTGGTCAGGTTCTGGCCAAACCGGGCTCCATCAAACCTCACACGAAA<br>TTTGAAGCCGAGGTGTACGTGCTGACTAAAGAAGAAGGTGGCCGTCAC<br>ACTCCATTCTCAACGGCTATCGTCCGAGTTCTACTTTCGACCACGG                                                                                                                                                                                                    |

|  |                                                                                                                                                                                            |
|--|--------------------------------------------------------------------------------------------------------------------------------------------------------------------------------------------|
|  | ACGTGACCGGTGTGATTACCCTGCCTGAAGGTGTTGAGATGGTTATGC<br>CGGGCGACAACGTTACTATGACCGTGGAAGTATCCACCCTATTGCGA<br>TGGAAGAAGGTCTGCGTTTTGCCATCCGTGAAGGTGGTCGTACCGTTG<br>GCGCCGGTGTGGTTCCAAAATCATCGAAtaa |
|--|--------------------------------------------------------------------------------------------------------------------------------------------------------------------------------------------|

**Supplementary Table 5. Primers used in this study**

| Oligo name              | Oligo sequence (5' to 3')                                             |
|-------------------------|-----------------------------------------------------------------------|
| tufB::kansacolor_fw     | GTGATATCACCGATTTATCCGTGTCTTAGAGGGACAATCGATCA<br>AAGGGAAAACGTGCCA      |
| tufB::kansacolor_rv     | ATGCCCTTTTAGTGCGCATTGCGTCAAATGTTATCGGCCAAAAA<br>TGAGACGTTGATCGGCACG   |
| tufB_coli_fw            | TTCTTTTCTCCTCCCTGT                                                    |
| tufB_coli_rv            | GGCAAACCAAATCGAAAC                                                    |
| tufA::topo1.317_fw      | CCGAAGCGCCCTTTTCAATTCAAACAACTAATTAACGTGTAAttaAGCGATGATTTT<br>CGCAACCA |
| tufA::topo1.317_rv      | CTCTCCTGAAGGGGAGAGCACTATAGTAAGGAATATAGCCgtgTCCAAAGAGA<br>AATTTGAACG   |
| tufA::topo2.262_fw      | CCGAAGCGCCCTTTTCAATTCAAACAACTAATTAACGTGTAAttaTTCGATGATTTTG<br>GAAACCA |
| tufA::topo2.262_rv      | CTCTCCTGAAGGGGAGAGCACTATAGTAAGGAATATAGCCgtgGCCAAAGAGA<br>AATTTGAACG   |
| tufA::topo2.253_fw      | CCGAAGCGCCCTTTTCAATTCAAACAACTAATTAACGTGTAAttaTTCGATGATTTT<br>GGAAACCA |
| tufA::topo2.253_rv      | CTCTCCTGAAGGGGAGAGCACTATAGTAAGGAATATAGCCgtgGCCAAAGAGA<br>AATTTGAACG   |
| tufA::topo1.170_fw      | CCGAAGCGCCCTTTTCAATTCAAACAACTAATTAACGTGTAAttaTTCGATGATTTT<br>GGAAACCA |
| tufA::topo1.170_rv      | CTCTCCTGAAGGGGAGAGCACTATAGTAAGGAATATAGCCgtgGCCAAAGAGA<br>AATTTGAACG   |
| tufA::topo1.168_fw      | CCGAAGCGCCCTTTTCAATTCAAACAACTAATTAACGTGTAAttaTTCGATGACTTC<br>GGTAACCA |
| tufA::topo1.168_rv      | CTCTCCTGAAGGGGAGAGCACTATAGTAAGGAATATAGCCgtgGCCAAAGAGA<br>AATTTGTACG   |
| tufA::topo2.184_fw      | CCGAAGCGCCCTTTTCAATTCAAACAACTAATTAACGTGTAAttaTTCGATGATTTTG<br>GAAACCA |
| tufA::topo2.184_rv      | CTCTCCTGAAGGGGAGAGCACTATAGTAAGGAATATAGCCgtgGCCAAAGAGA<br>AATTTGAACG   |
| tufA::tufA.sty_fw       | CCGAAGCGCCCTTTTCAATTCAAACAACTAATTAACGTGTAATTAGCCCAGAACTTT<br>AGCAA    |
| tufA::tufA.sty_rv       | CTCTCCTGAAGGGGAGAGCACTATAGTAAGGAATATAGCCGTGTCTAAAGAAA<br>AATTTGA      |
| tufA::tufB.vcholerae_fw | CCGAAGCGCCCTTTTCAATTCAAACAACTAATTAACGTGTAATTAAGCGATGATCT<br>TAGCTACAA |
| tufA::tufB.vcholerae_rv | CTCTCCTGAAGGGGAGAGCACTATAGTAAGGAATATAGCCGTGTCTAAAGAGA<br>AATTTGAACG   |
| tufA::tuf.msmeg_fw      | CCGAAGCGCCCTTTTCAATTCAAACAACTAATTAACGTGTAATTACTTGATGATCTT<br>GGTGACGC |
| tufA::tuf.msmeg_rv      | CTCTCCTGAAGGGGAGAGCACTATAGTAAGGAATATAGCCGTGGCGAAGGCG<br>AAGTTCCGACG   |

Kacar, *et.al.* Supporting Information

|                           |                                                                             |
|---------------------------|-----------------------------------------------------------------------------|
| tufA::tuf.bsub_fw         | CGAAGCGCCCTTTTCAATTCAAACAACTAATTAACGTGTAATTACTCAGTGATTGTA<br>GAAACAAC       |
| tufA::tuf.bsub_rv         | CTCTCCTGAAGGGGAGAGCACTATAGTAAGGAATATAGCCGTGGCTAAAGAA<br>AAATTGACCG          |
| tufA::tuf.thermophilus_fw | CCGAAGCGCCCTTTTCAATTCAAACAACTAATTAACGTGTAATTATCCAGGATTTT<br>GGTAACCA        |
| tufA::tuf.thermophilus_rv | CTCTCCTGAAGGGGAGAGCACTATAGTAAGGAATATAGCCGTGGCCAAAGGT<br>GAATTTATCCG         |
| tufA::tuf.maritima_fw     | CCGAAGCGCCCTTTTCAATTCAAACAACTAATTAACGTGTAATTATTCGATGACTTC<br>GGTAACCA       |
| tufA::tuf.maritima_rv     | CTCTCCTGAAGGGGAGAGCACTATAGTAAGGAATATAGCCGTGGCCAAAGAG<br>AAATTTGTACG         |
| tufA::tuf.spyogenes_fw    | CCGAAGCGCCCTTTTCAATTCAAACAACTAATTAACGTGTAATTAAGCTTCGATTTTC<br>TGAAACGA      |
| tufA::tuf.spyogenes_rv    | CTCTCCTGAAGGGGAGAGCACTATAGTAAGGAATATAGCCGTGGCAAAGAA<br>AAATACGATCG          |
| del_kansacblue_tufB_coli  | CTTTTAGTGCGCATTGCGTCAAATGTTATCGGCAACGATTGTCCCTCTAAGACA<br>CGGATAAATCGGTGAT  |
| del_kansacblue_tufA_coli  | GCGCCCTTTTCAATTCAAACAACTAATTAACGTGTAAGGCTATATTCTTACTATAG<br>TGCTCTCCCCTTCAG |
| tufs_check_fw             | CAAAACAAAAGTCCTACGCA                                                        |
| tufs_check_rv             | AGTATGATGAAGCGCCGA                                                          |
| check_deltufA_coli_fw     | GTCAACAAATGCAAAAAGGG                                                        |
| check_deltufA_coli_rv     | AAACTCCGGAAGAGAACAC                                                         |
| check_deltufB_coli_fw     | TCCCCACCACCAATTTTC                                                          |
| check_deltufB_coli_rv     | CCCACTTCATCGCTTCCA                                                          |
| tufA::tuf.legionella_fw   | CCGAAGCGCCCTTTTCAATTCAAACAACTAATTAACGTGTAATTACTCGATTATTTT<br>AGCGA          |
| tufA::tuf.legionella_rv   | TCTCTCCTGAAGGGGAGAGCACTATAGTAAGGAATATAGCCgTGGCGAAGGAA<br>AAATTTGAACG        |
| tufA::tuf.bartonella_fw   | CCGAAGCGCCCTTTTCAATTCAAACAACTAATTAACGTGTAATTACTCAATGATCTT<br>AGAAA          |
| tufA::tuf.bartonella_rv   | CTCTCCTGAAGGGGAGAGCACTATAGTAAGGAATATAGCCgTGGCGAAGAGC<br>AAATTTGAACG         |
| tufA::tuf.yersinia_fw     | CCGAAGCGCCCTTTTCAATTCAAACAACTAATTAACGTGTAATTAAGCGATAACTTT<br>AGCAA          |
| tufA::tuf.yersinia_rv     | CTCTCCTGAAGGGGAGAGCACTATAGTAAGGAATATAGCCGTGTCTAAAGAAA<br>AATTTGAACG         |
| tufA_yersinia_fw          | TTGAATGGTATGTGGGTG                                                          |
| tufA_yersinia_rv          | TGGAGTTCCTGAAGTATG                                                          |
| tufA::tuf.pseudomonas_fw  | CCGAAGCGCCCTTTTCAATTCAAACAACTAATTAACGTGTAATTACTCGATGATCTT<br>GGCAA          |
| tufA::tuf.pseudomonas_rv  | ATGCCCTTTTAGTGCGCATTGCGTCAAATGTTATCGGCAATTACTCGATGATCTT<br>GGCAA            |
| tufA_pseudomonas_fw       | CCGGATTTGTTGGTTTTG                                                          |



Kacar, *et.al.* Supporting Information

|                       |                      |
|-----------------------|----------------------|
| tufA_pseudomonas_rv   | TGGGTGAGATGTTTCGGTT  |
| tufA_coli_qPCR_fw     | ACTTTGATGATACCGCGTT  |
| tufA_coli_qPCR_rv     | ATTGACAAGCCGTTCTG    |
| tufA_sty_qPCR_fw      | ACATTTCAACGCCAGTACAG |
| tufA_sty_qPCR_rv      | CGTTGTTACCGGTCGTGT   |
| tufA_yersinia_qPCR_fw | GATTGGCAGCAGGAATGG   |
| tufA_yersinia_qPCR_rv | AGGCGTTAAAGAGTGGGA   |
| tufB_vibrio_qPCR_fw   | CGATTGGCATCAGGAATG   |
| tufB_vibrio_qPCR_rv   | GTGGGAAGCGAAGATTGT   |
| tufA_pseudo_qPCR_fw   | CCAACGTTCTCACCAGCA   |
| tufA_pseudo_qPCR_rv   | AAGGTCCAGGAAGAAGTG   |
| tuf_317_qPCR_fw       | CGGTGCAGGTAGTTTTGGT  |
| tuf_317_qPCR_rv       | TTTCAGCATCTCCGGTCGT  |

**References for supplementary information**

Demchak B, Hull T, Reich M, Liefeld T, Smoot M, Ideker T, Mesirov JP. 2014. Cytoscape: the network visualization tool for GenomeSpace workflows. *F1000Res* 3:151.

Gaucher EA, Govindarajan S, Ganesh OK. 2008. Palaeotemperature trend for Precambrian life inferred from resurrected proteins. *Nature* 451:704-707.

Patil A, Nakai K, Nakamura H. 2011. HitPredict: a database of quality assessed protein-protein interactions in nine species. *Nucleic Acids Res* 39:D744-749.

Pettersen EF, Goddard TD, Huang CC, Couch GS, Greenblatt DM, Meng EC, Ferrin TE. 2004. UCSF Chimera--a visualization system for exploratory research and analysis. *J Comput Chem* 25:1605-1612.

Song H, Parsons MR, Rowsell S, Leonard G, Phillips SE. 1999. Crystal structure of intact elongation factor EF-Tu from *Escherichia coli* in GDP conformation at 2.05 Å resolution. *J Mol Biol* 285:1245-1256.
